# Supplementary material for: Fetal Alcohol Spectrum Disorder: The Honey Bee as a Social Animal Model
Source: MDPI journal article supplement (doi:10.3390/life14040434), 2024-03-25
Supplement: s1 [file s1]

TableS1. Amount and percentage of diet components in the larval diet necessary to feed approximately 400 larvae according to Schmehl et al. [15].

| <b>Diet Component</b> | <b>Amount of diet components (g)</b> |               |               | <b>Percentage of diet components in total diet</b> |               |               |
|-----------------------|--------------------------------------|---------------|---------------|----------------------------------------------------|---------------|---------------|
|                       | <b>Diet A</b>                        | <b>Diet B</b> | <b>Diet C</b> | <b>Diet A</b>                                      | <b>Diet B</b> | <b>Diet C</b> |
| <b>Royal jelly</b>    | 4.43                                 | 4.30          | 25.00         | 44.25                                              | 42.95         | 50.00         |
| <b>Glucose</b>        | 0.53                                 | 0.64          | 4.50          | 5.30                                               | 6.40          | 9.00          |
| <b>Fructose</b>       | 0.53                                 | 0.64          | 4.50          | 5.30                                               | 6.40          | 9.00          |
| <b>Yeast extract</b>  | 0.09                                 | 0.13          | 1.00          | 0.90                                               | 1.30          | 2.00          |
| <b>Water</b>          | 4.43                                 | 4.30          | 15.00         | 44.25                                              | 42.95         | 30.00         |
| <b>Total</b>          | 10                                   | 10            | 50            | 100                                                | 100           | 100           |
